# Supplementary material for: RIsearch2: suffix array-based large-scale prediction of RNA–RNA interactions and siRNA off-targets
Source: PubMed Central journal article supplement — Nucleic Acids Res. 2017 Jan 20;45(8):e60. doi: 10.1093/nar/gkw1325 (PMC5416843; doi:10.1093/nar/gkw1325), 2017-01-20
Supplement: gkw1325_supp.pdf [file gkw1325_supp.pdf]

RIsearch2: suffix array-based large-scale prediction of  
RNA–RNA interactions and siRNA off-targets  
(Supplementary Document)

Ferhat Alkan, Anne Wenzel, Oana Palasca, Peter Kerpedjiev, Anders Frost  
Rudebeck, Peter F. Stadler, Ivo L. Hofacker, and Jan Gorodkin\*

January 17, 2017

---

\*To whom correspondence should be addressed. Tel: +45 353 33578; Fax: +45 353 34704; Email: gorodkin@rth.dk

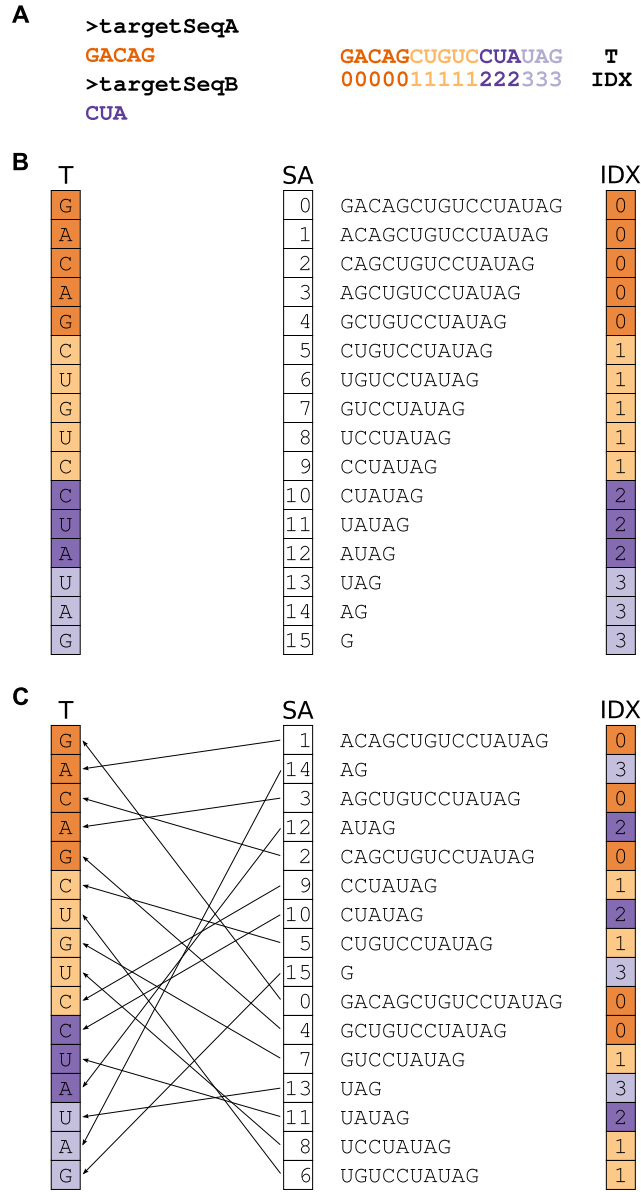

Supplementary Figure S1: Building the target suffix array. (A) Given a target FASTA file as shown on the left, the concatenated target string  $T$  contains each sequence in original orientation back-to-back with its own reverse complement. Values in  $IDX$  identify the originating sequence (where odd numbers mark the reverse complement of the previous sequence). (B) Listed are all 16 suffixes of  $T$  with their starting positions (in range  $0 \dots 15$ ).  $T$  and  $IDX$  are in order as in (A). (C) To construct the suffix array  $SA$ , the suffixes are sorted in lexicographic order. The arrows indicate where the suffix is found in the original string  $T$ .  $IDX$  is re-arranged according to  $SA$ . The three vectors  $T$ ,  $SA$ , and  $IDX$  are condensed into one 64-bit array and stored on disc for further use.

Supplementary Table S1: Six siRNAs from Burchard dataset.

| siRNA ID | siRNA antisense sequence (5' to 3') |
|----------|-------------------------------------|
| APOB-Hs1 | AAUUUUCAAAGUCCAAU                   |
| APOB-Hs2 | UAGUUAUUCAGGAAGUCUA                 |
| APOB-Hs3 | AUUUCAGGAAUUGUAAAAG                 |
| APOB-Hs4 | UUGGUAUUCAGUGUGAUGA                 |
| APOB-Mm1 | UUUCAAUUGUAUGUGAGAG                 |
| APOB-Mm2 | UUUUGCUUCAUUAUAGGAG                 |

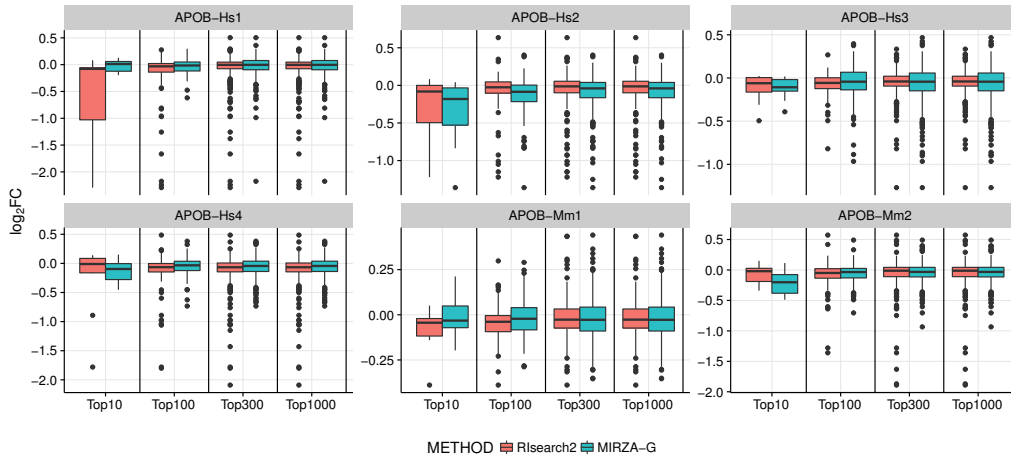

Supplementary Figure S2: siRNA-specific  $\log_2 FC$  distributions of top transcripts predicted by Rlsearch2 (siRNA off-targets pipeline) and MIRZA-G in the Burchard dataset, PLC/PRF/5 cell line. Note that this figure should be evaluated together with Figure 3 in the main document.

Supplementary Table S2: siRNAs considered for the evaluation of off-targeting potential measures.

| Dataset ID    | Array ID       | siRNA antisense sequence (5' to 3') | on-target gene  | POTS | POFF <sub>3'</sub> | POFF     |
|---------------|----------------|-------------------------------------|-----------------|------|--------------------|----------|
| Dharmacon2008 | 1595297361     | UGUUGCGUUCGGAGAGGCG                 | ENSG00000166794 | 25   | 0.001885           | 0.004523 |
| Dharmacon2008 | 1595297366     | UUCGUAGGUCAAAAUACAC                 | ENSG00000166794 | 23   | 0.002073           | 0.005964 |
| Dharmacon2008 | 1595297373     | CACCGUAGAUGCUCUUUCC                 | ENSG00000166794 | 29   | 0.004996           | 0.44155  |
| Dharmacon2008 | 1595297378     | GUUGCGUUCGGAGAGGCGC                 | ENSG00000166794 | 40   | 0.000135           | 0.000395 |
| Dharmacon2008 | 1595297383     | UUCAUCUCCAAUUCGUAGG                 | ENSG00000166794 | 407  | 0.001081           | 0.05085  |
| Dharmacon2008 | 1595297389     | AUGCUCUUUCCUCCUGUGC                 | ENSG00000166794 | 410  | 1.000000           | 1.000000 |
| Dharmacon2008 | 1595297394     | UUUUGGAACAGUCUUUCCG                 | ENSG00000166794 | 510  | 0.107259           | 0.766603 |
| Dharmacon2008 | 1595297399     | UUUGGAACAGUCUUUCCGA                 | ENSG00000166794 | 410  | 0.071367           | 0.454657 |
| Dharmacon2008 | 1595297422     | CCAAACACCACAUGCUCUUC                | ENSG00000166794 | 597  | 0.004381           | 0.398346 |
| Dharmacon2008 | 1595297427     | AAAUACACCUUGACGGUGA                 | ENSG00000166794 | 595  | 0.986031           | 0.992469 |
| Dharmacon2008 | 1595297438     | GCAGGAAGAAGACGGACCC                 | ENSG00000166794 | 667  | 0.000884           | 0.001998 |
| Dharmacon2008 | 1595297444     | CAGGCUGUCUUGACUGUCG                 | ENSG00000166794 | 560  | 0.001269           | 0.021349 |
| Dharmacon2008 | 1595297470     | UCCGACGCCUGCUUCACCA                 | ENSG00000111640 | 15   | 0.002447           | 0.785576 |
| Dharmacon2008 | 1595297477     | GGUCGUUGAGGGCAAUGCC                 | ENSG00000111640 | 28   | 0.00336            | 0.997732 |
| Dharmacon2008 | 1595297486     | UCGUUGAGGGCAAUGCCAG                 | ENSG00000111640 | 30   | 0.009296           | 0.992592 |
| Dharmacon2008 | 1595297491     | AAGCUUCCCGUUCUCAGCC                 | ENSG00000111640 | 308  | 0.137224           | 0.956974 |
| Dharmacon2008 | 1595297496     | AAGUCAGAGGAGACCACCU                 | ENSG00000111640 | 295  | 0.068246           | 0.997708 |
| Dharmacon2008 | 1595297501     | AUGAGCCCCAGCCUUCUCC                 | ENSG00000111640 | 336  | 0.010255           | 0.434668 |
| Dharmacon2008 | 1595297507     | CAAGCUUCCCGUUCUCAGC                 | ENSG00000111640 | 312  | 0.005592           | 0.928328 |
| Dharmacon2008 | 1595297513     | UGGCAGUGAUGGCAUGGAC                 | ENSG00000111640 | 380  | 0.011579           | 0.981844 |
| Dharmacon2008 | 1595297518     | AUUUCCAUAUGAUGACAAGC                | ENSG00000111640 | 736  | 0.000385           | 0.339128 |
| Dharmacon2008 | 1595297524     | AAAAGCAGCCCGUGGUGACC                | ENSG00000111640 | 696  | 0.091171           | 0.978453 |
| Dharmacon2008 | 1595297530     | GAGGCUGUUGUCAUACUUC                 | ENSG00000111640 | 560  | 0.366275           | 0.994911 |
| Dharmacon2008 | 1595297535     | CAUAUUUGGCAGGUUUUUC                 | ENSG00000111640 | 848  | 0.002103           | 0.431927 |
| Dharmacon2008 | 1595297546     | GAGGCAGGGAUGAUGUUCU                 | ENSG00000111640 | 733  | 0.001725           | 0.414098 |
| Dharmacon2006 | 16012097016666 | AGUUGCUUCAAAUCUGCUC                 | ENSG00000169032 | 253  | 0.633537           | 0.927307 |
| Dharmacon2006 | 16012097016667 | ACUUGAUCCAGAGAACCUC                 | ENSG00000169032 | 225  | 0.9472             | 0.99867  |
| Dharmacon2006 | 16012097016668 | UCAAUCUGCUCUCUCUGC                  | ENSG00000169032 | 380  | 0.86958            | 0.9568   |
| Dharmacon2006 | 16012097016669 | AGAACCUCCAUCCAUGUGC                 | ENSG00000169032 | 211  | 0.999987           | 0.999999 |
| Dharmacon2006 | 16012097017936 | UCACCGUAGAUGCUCUUUC                 | ENSG00000166794 | 67   | 0.043415           | 0.185472 |
| Dharmacon2006 | 16012097017939 | UUUGUAGCCAAAUCCUUUC                 | ENSG00000166794 | 233  | 0.023665           | 0.947547 |
| Dharmacon2006 | 16012097017951 | ACACGAUGGAAUUUGCUGU                 | ENSG00000166794 | 64   | 0.002071           | 0.006507 |
| Dharmacon2006 | 16012097017953 | UUUUUGGAACAGUCUUUCC                 | ENSG00000166794 | 480  | 0.444406           | 0.929395 |
| Dharmacon2006 | 16012097018568 | UGGUGAAGUCUCCGCCUG                  | ENSG00000166794 | 338  | 0.009484           | 0.21155  |
| Dharmacon2006 | 251209725370   | UAUUGGAACAUGUAAACCA                 | ENSG00000111640 | 239  | 0.001483           | 0.917924 |
| Dharmacon2006 | 251209725411   | CUUGAGGCUGUUGUCAUAC                 | ENSG00000111640 | 308  | 0.002144           | 0.836531 |
| Dharmacon2006 | 251209725538   | CUCUCCUGUAGCUAAGGCC                 | ENSG00000166794 | 638  | 0.357868           | 0.99135  |

Continued on next page

Supplementary Table S2 – continued from previous page

| Dataset ID | Array ID  | siRNA antisense sequence (5' to 3') | on-target gene  | POTS | POFF <sub>3'</sub> | POFF     |
|------------|-----------|-------------------------------------|-----------------|------|--------------------|----------|
| GSE5769    | GSM134317 | GGCCAAAGAUUCAAGCCA                  | ENSG00000121879 | 347  | 0.999903           | 0.999906 |
| GSE5769    | GSM134319 | GGUGAUCACUCUCCUUCAU                 | ENSG00000138182 | 220  | 0.999291           | 0.999514 |
| GSE5769    | GSM134321 | CAGAAACCUGGUGGUCAAU                 | ENSG00000115904 | 500  | 0.228054           | 0.700913 |
| GSE5769    | GSM134323 | CUCAAAUAGGUCGUCCUCA                 | ENSG00000171132 | 646  | 0.895007           | 0.99331  |
| GSE5769    | GSM134325 | CUUACCCUUUUGGGUUCUG                 | ENSG00000134086 | 176  | 1.000000           | 1.000000 |
| GSE5769    | GSM134521 | AACCGCAGUUCUCUGUAGG                 | ENSG00000112062 | 56   | 0.092327           | 0.94342  |
| GSE5769    | GSM134327 | CACACCCUGCCUAUUUCCU                 | ENSG00000134086 | 228  | 1.000000           | 1.000000 |
| GSE5769    | GSM134551 | CUAGUGUCAUUCGCAUGUC                 | ENSG00000138182 | 189  | 0.081901           | 0.120337 |
| GSE5291    | GSM119707 | GCAAGUCUCCAACAUGCCU                 | ENSG00000142168 | 297  | 0.106708           | 0.682785 |
| GSE5291    | GSM119708 | CGCAAGUCUCCAACAUGCC                 | ENSG00000142168 | 232  | 0.584707           | 0.775272 |
| GSE5291    | GSM119709 | GCGCAAGUCUCCAACAUGC                 | ENSG00000142168 | 37   | 0.210622           | 0.30274  |
| GSE5291    | GSM119710 | UGCGCAAGUCUCCAACAUG                 | ENSG00000142168 | 31   | 0.13633            | 0.729004 |
| GSE5291    | GSM119741 | UUGCGCAAGUCUCCAACAU                 | ENSG00000142168 | 35   | 0.029517           | 0.840096 |
| GSE5291    | GSM119742 | AUUGCGCAAGUCUCCAACA                 | ENSG00000142168 | 26   | 0.303014           | 0.602383 |
| GSE5291    | GSM119743 | CAUUGCGCAAGUCUCCAAC                 | ENSG00000142168 | 28   | 0.02303            | 0.884827 |
| GSE5291    | GSM119744 | ACAUUGCGCAAGUCUCCAA                 | ENSG00000142168 | 160  | 0.02209            | 0.059624 |
| GSE5291    | GSM119745 | CACAUUGCGCAAGUCUCCA                 | ENSG00000142168 | 261  | 0.003989           | 0.080062 |
| GSE5291    | GSM119746 | UCACAUUGCGCAAGUCUCC                 | ENSG00000142168 | 471  | 0.013149           | 0.125626 |
| GSE5291    | GSM119747 | GUCACAUUGCGCAAGUCUC                 | ENSG00000142168 | 529  | 0.200849           | 0.085258 |
| GSE5291    | GSM119748 | AGUCACAUUGCGCAAGUCU                 | ENSG00000142168 | 331  | 0.155389           | 0.041397 |
| GSE5291    | GSM119749 | CAGUCACAUUGCGCAAGUC                 | ENSG00000142168 | 323  | 0.033343           | 0.021682 |
| GSE5291    | GSM119750 | GCAGUCACAUUGCGCAAGU                 | ENSG00000142168 | 343  | 0.004085           | 0.032111 |
| GSE5291    | GSM119759 | AGCAGUCACAUUGCGCAAG                 | ENSG00000142168 | 244  | 0.002539           | 0.029897 |
| GSE5291    | GSM119761 | CAGCAGUCACAUUGCGCAA                 | ENSG00000142168 | 287  | 0.054073           | 0.253648 |
| GSE5291    | GSM119762 | GUCAGCAGUCACAUUGCGC                 | ENSG00000142168 | 449  | 0.051946           | 0.154575 |
| GSE5291    | GSM119763 | UGUCAGCAGUCACAUUGCG                 | ENSG00000142168 | 248  | 0.109305           | 0.173462 |

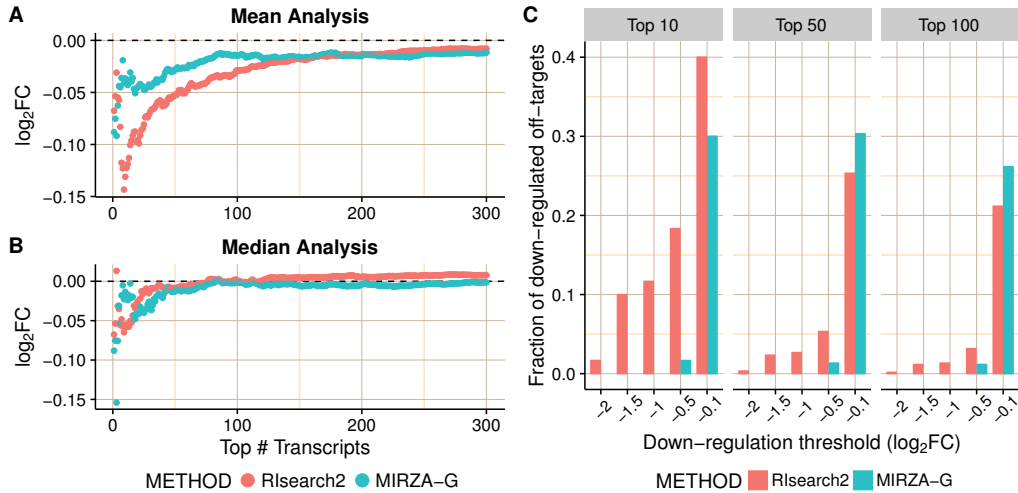

Supplementary Figure S3: Evaluation of individual off-target predictions performed by Rlsearch2 (siRNA off-targets pipeline) and MIRZA-G. All analyses are based on the Burchard dataset where six *APOB* siRNAs were transfected into HUH7 cell lines. Top off-targets are selected from method-specific predictions based on the confidence scores generated by either method ( $p_{off,j}$  for Rlsearch2). In the mean (A) and the median (B) fold changes analyses, mean/median differential expression level (averaged over all siRNAs) of top off-targets are plotted for different numbers of top off-targets considered. (C) Proportion of critical off-targets within the top (10, 50, 100) predictions generated by either method for six siRNAs. Off-targets are considered critical if they are down-regulated, upon siRNA transfection, with a  $\log_2 FC$  value lower than the threshold given in the x-axis.

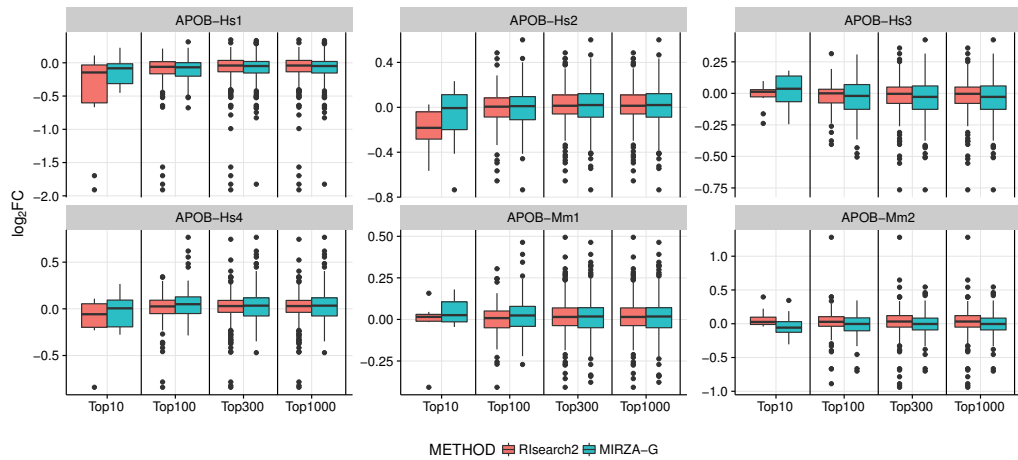

Supplementary Figure S4: siRNA-specific  $\log_2 FC$  distributions of top transcripts predicted by Rlsearch2 (siRNA off-targets pipeline) and MIRZA-G in the Burchard dataset, HUH7 cell line. Note that this figure should be evaluated together with Supplementary Figure 3.

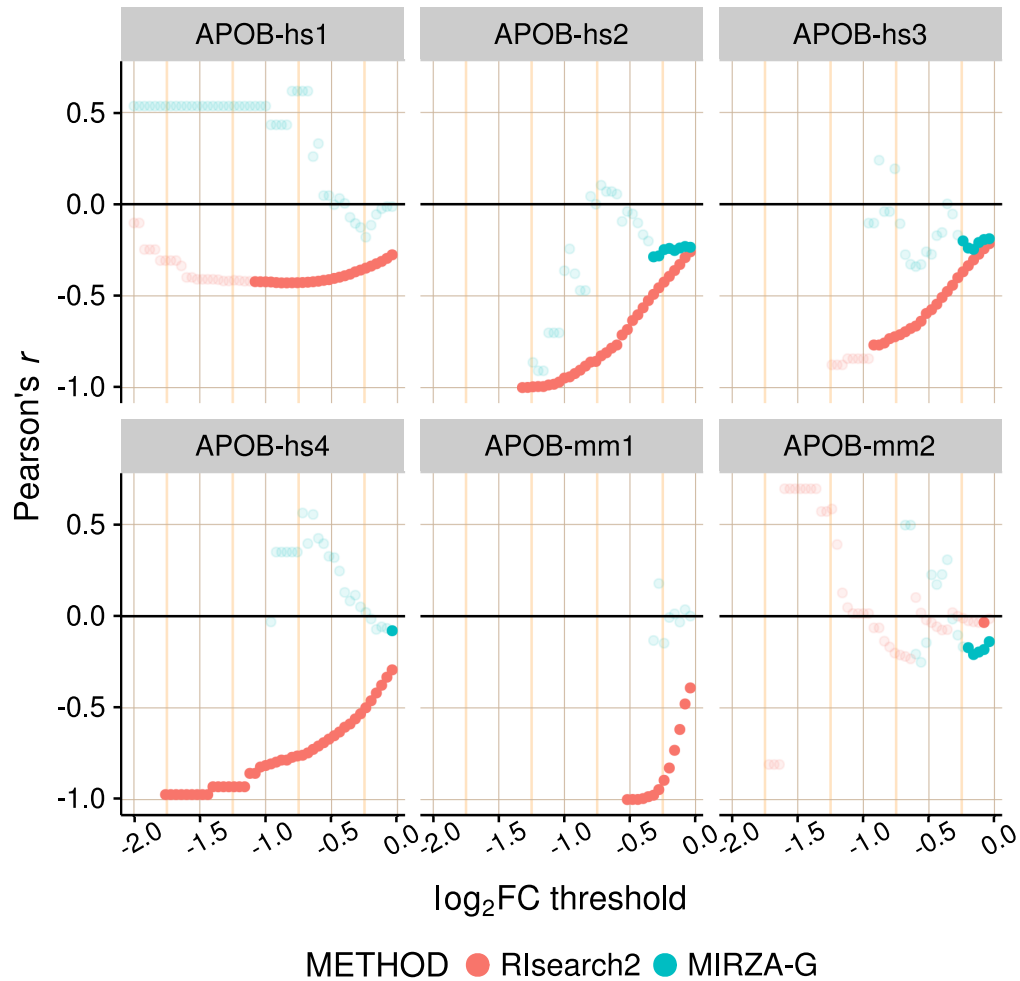

Supplementary Figure S5: Pearson correlation analysis between transcript-specific down-regulation measure ( $\log_2 FC$ ) and off-target confidence scores generated by either method ( $p_{off,j}$  for Rlsearch2). Each point corresponds to a method- and threshold-specific Pearson's correlation coefficient (y-axis) between method-based off-target confidence score and down-regulation level ( $\log_2 FC$  value). The set of transcripts considered in each of them is limited to those with down-regulation lower than the  $\log_2 FC$  threshold given in the x-axis and that are predicted as an off-target by the corresponding method. Results are given separately for six siRNA transfection experiments in PLC/PRF/5 cell line. Only significant correlations ( $p$ -value < 0.05) are highlighted.

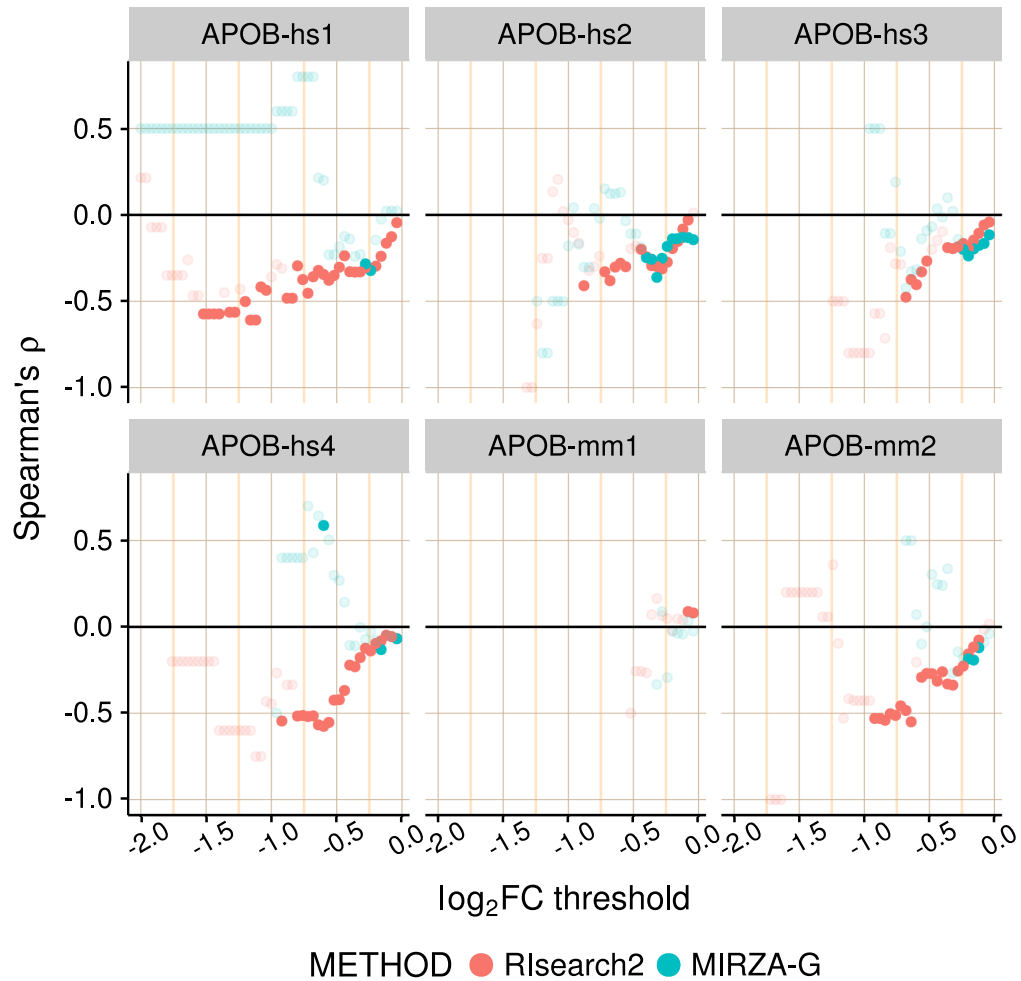

Supplementary Figure S6: Rank correlation analysis between transcript-specific down-regulation measure ( $\log_2 FC$ ) and off-target confidence scores generated by either method ( $p_{off,j}$  for Rlsearch2). Each point corresponds to a method- and threshold-specific Spearman's rank correlation coefficient (y-axis) between method-based off-target confidence score and down-regulation level ( $\log_2 FC$  value). The set of transcripts considered in each of them is limited to those with down-regulation lower than the  $\log_2 FC$  threshold given in the x-axis and that are predicted as an off-target by the corresponding method. Results are given separately for six siRNA transfection experiments in PLC/PRF/5 cell line. Only significant correlations (p-value < 0.05) are highlighted.



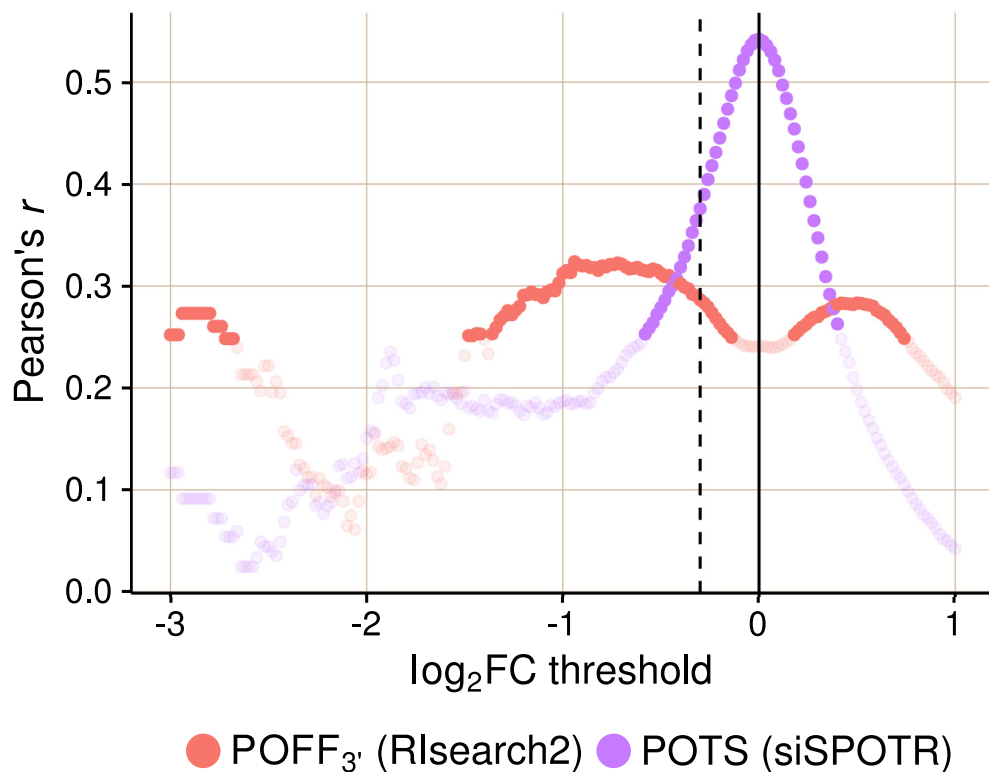

Supplementary Figure S7: Evaluation of predicted off-targeting potential measures with siRNA-specific differential expression data from 63 siRNA transfection experiments. Pearson's  $r$  is given for each correlation analysis between method-specific off-targeting potential measure, Rlsearch2-based  $POFF_{3'}$  or siSPOTR-based  $POTS$ , and threshold-specific expression-based off-targeting potential measure of 63 siRNAs. The expression-based measure is the *total differential expression* (sum of corresponding  $-\log_2 FC$  values) of transcripts that have a complementary heptamer to the siRNA seed region in their 3' UTR and are differentially expressed upon siRNA transfection with a  $\log_2 FC$  value lower than the threshold given on the x-axis. Only significant correlations ( $p$ -value  $< 0.05$ ) are highlighted and the  $\log_2 FC$  threshold  $-0.3$ , which is the evaluation threshold employed in the siSPOTR study, is shown with a dashed line.

## Huesken Dataset

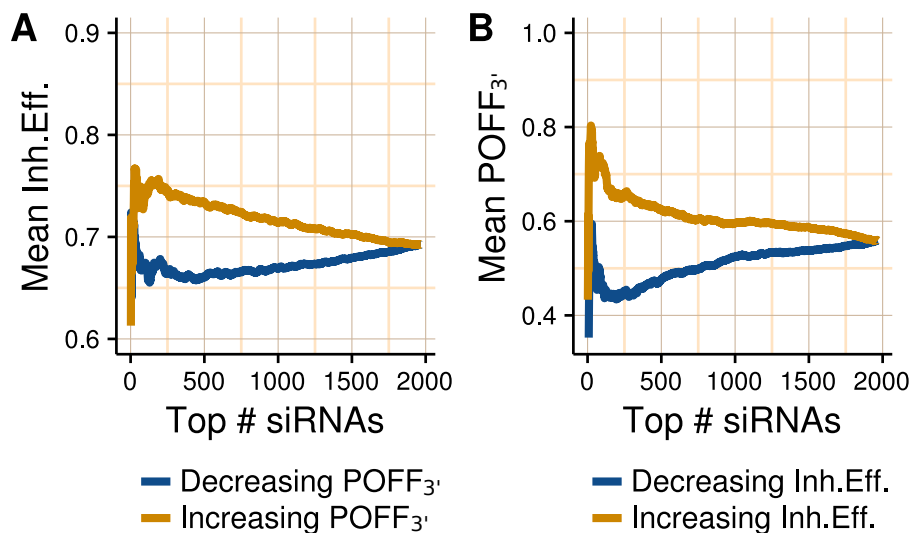

## DSIR Dataset

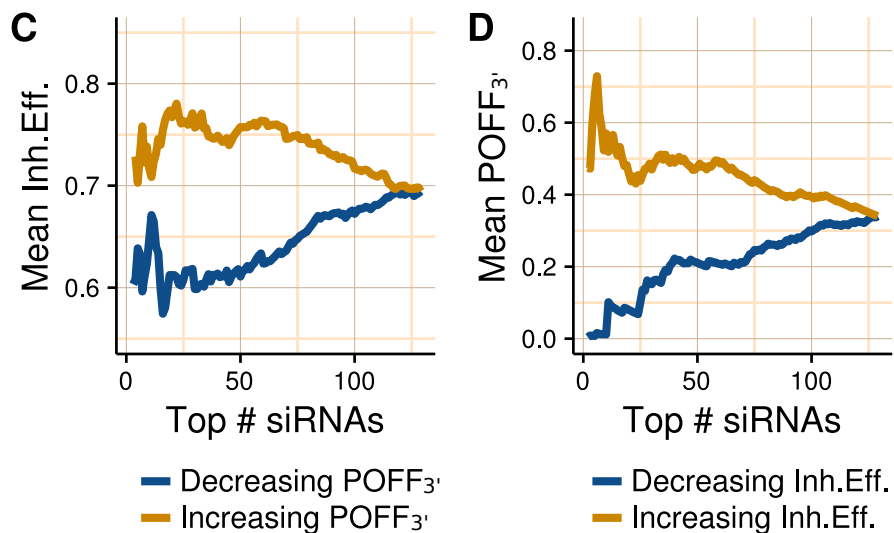

Supplementary Figure S8: Relationship between inhibition efficiency (*Inh.Eff.*) and off-targeting potential measure  $POFF_{3'}$  of siRNAs from Huesken (A, B) and DSIR (C, D) datasets. A and C show the mean *Inh.Eff.* of top  $n$  siRNAs when siRNAs are ranked by  $POFF_{3'}$  measure in increasing and decreasing order. B and D show the mean  $POFF_{3'}$  measure of top  $n$  siRNAs when siRNAs are ranked by *Inh.Eff.* in increasing and decreasing order. Note that y-axes are not in the same scale.

Supplementary Table S3: Execution time and parameter settings of RNA–RNA interaction prediction tools based on a small test set (63 siRNAs vs. 5982 transcripts from human chromosome X and their antisense, all transcripts are longer than 80 nt). The first row, RIssearch2 (precomputation), corresponds to the creation of the target suffix array, which is used by subsequent runs. We timed RIssearch2 with different parameter settings, all with an energy threshold of  $-10$  kcal/mol and seed extension limited to 20 nt up-/downstream. We present running times for the single-threaded version for six different seed settings, as well as running times for a fixed seed setting with increasing number of threads (2, 4, 8, 16). The times for RIssearch2 cover an entire run, including reading the index and writing compressed output files, but excluding the precomputation (first row). Running time with the seed definition 1:12/6, default for the siRNA off-targets discovery pipeline, is given in bold. For the predecessor version RIssearch, we show the default behaviour in the first row, which only returns the single best interaction per query (siRNA)–target pair, and the variant with score threshold (`-s 1560`) that relates to a maximum hybridisation energy of  $-10$  kcal/mol. We selected a seed length of six for GUUGle and IntaRNA, and parameters `-w 80`, `-L 40` and `-l 30` for IntaRNA in parallel with our siRNA off-target discovery pipeline. For RNAPlex, `-e -10` and `-l 30` were also selected in parallel with our pipeline. MIRZA-G, PITA and miRanda were timed with recommended default settings with an additional run for miRanda where predictions were filtered with  $-10$  kcal/mol energy threshold. The PITA and IntaRNA runs have been aborted after running for more than two days. Longer running times of these two tools can in part be explained by the fact that they also compute accessibility profiles on given target transcripts.

| Method                      | Parameters                                     | Execution time |               |
|-----------------------------|------------------------------------------------|----------------|---------------|
|                             |                                                | in seconds     | equivalent    |
| RIssearch2 (precomputation) | <code>-c target.fa -o target.suf</code>        | ~7s            | ~.1 m         |
| RIssearch2                  | <code>-s 2:7 -e -10 -l 20 -t 1</code>          | ~20s           | ~.3 m         |
| RIssearch2                  | <code>-s 2:7/5 -e -10 -l 20 -t 1</code>        | ~78s           | ~1.3 m        |
| <b>RIssearch2</b>           | <code>-s 1:12/6 -e -10 -l 20 -t 1</code>       | <b>~89s</b>    | <b>~1.5 m</b> |
| RIssearch2                  | <code>-s 1:12/7 -e -10 -l 20 -t 1</code>       | ~32s           | ~.5 m         |
| RIssearch2                  | <code>-s 1:12/8 -e -10 -l 20 -t 1</code>       | ~11s           | ~.2 m         |
| RIssearch2                  | <code>-s 6 -e -10 -l 20 -t 1</code>            | ~171s          | ~2.8 m        |
| RIssearch2                  | <code>-s 6 -e -10 -l 20 -t 2</code>            | ~88s           | ~1.5 m        |
| RIssearch2                  | <code>-s 6 -e -10 -l 20 -t 4</code>            | ~50s           | ~.8 m         |
| RIssearch2                  | <code>-s 6 -e -10 -l 20 -t 8</code>            | ~28s           | ~.5 m         |
| RIssearch2                  | <code>-s 6 -e -10 -l 20 -t 16</code>           | ~23s           | ~.4 m         |
| RIssearch                   |                                                | ~375s          | ~6.3 m        |
| RIssearch                   | <code>-s 1560 -p1</code>                       | ~940s          | ~15.7 m       |
| GUUGle                      | <code>-d 6</code>                              | ~220s          | ~3.7 m        |
| miRanda                     |                                                | ~568s          | ~9.5 m        |
| miRanda                     | <code>-en -10</code>                           | ~570s          | ~9.5 m        |
| MIRZA-G                     | <code>-T calculate_per_gene_scores -v 4</code> | ~3669s         | ~1 h          |
| RNAPlex                     | <code>-e -10 -l 30</code>                      | ~32052s        | ~9 h          |
| PITA                        |                                                | >172800s       | >2 d          |
| IntaRNA                     | <code>-p 6 -f 1,12 -P -w 80 -L 40 -l 30</code> | >172800s       | >2 d          |
